# Supplementary material
Source: Springer Nature journal article supplement (https://www.springermedizin.de/resource/supplementary/12875_2009_505_MOESM2_ESM.pdf/9434752)

**A**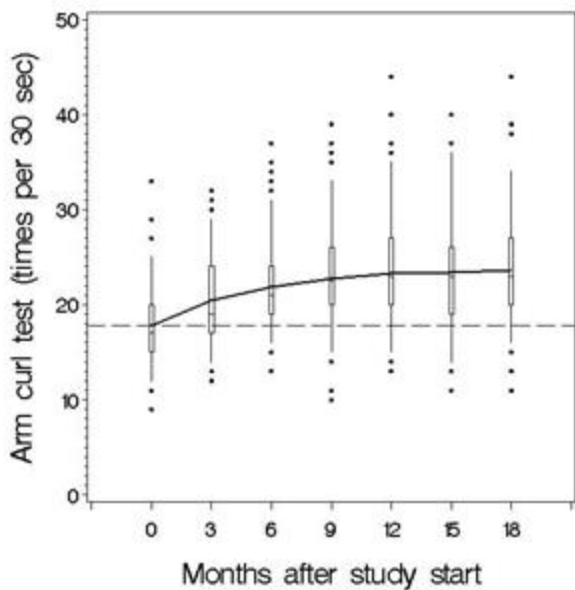**B**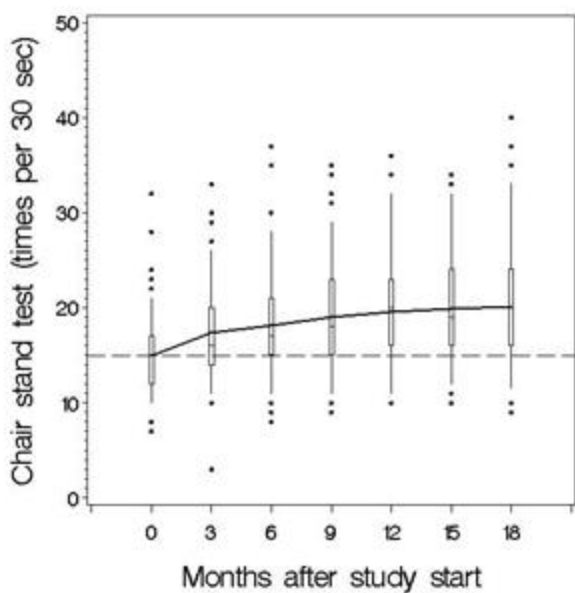**C**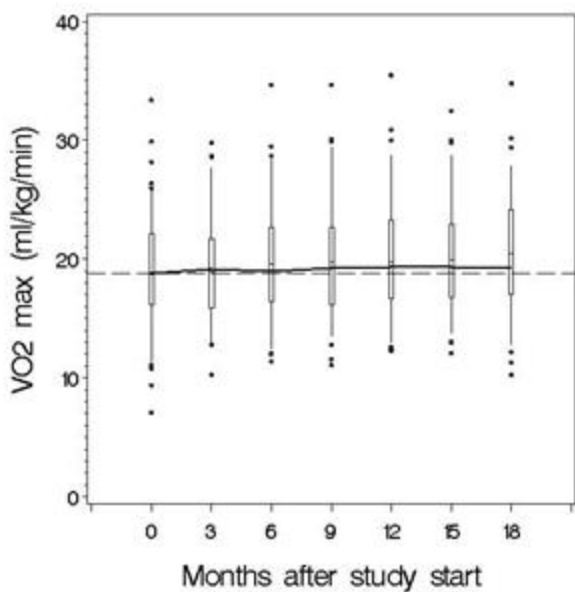

Supplement: MOESM2 [file 9434752]
